# Supplementary material for: MePHD1 as a PHD-Finger Protein Negatively Regulates ADP-Glucose Pyrophosphorylase Small Subunit1a Gene in Cassava
Source: Int J Mol Sci. 2018 Sep 19;19(9):2831. doi: 10.3390/ijms19092831 (PMC6164933; doi:10.3390/ijms19092831)
Supplement: Supplementary file 1 [file ijms-19-02831-s001.zip › Table S1.xlsx]

## Sheet: Sheet1
JGI Gene ID	Gene names	Protein names	Annotations
Manes.01G049100	Manes.01G049100.1	Manes.01G049100.1.p	PHD finger protein-related
Manes.01G055600	Manes.01G055600.1	Manes.01G055600.1.p	RING/FYVE/PHD zinc finger superfamily protein
Manes.01G055600	Manes.01G055600.2	Manes.01G055600.2.p	RING/FYVE/PHD zinc finger superfamily protein
Manes.01G055600	Manes.01G055600.3	Manes.01G055600.3.p	RING/FYVE/PHD zinc finger superfamily protein
Manes.01G097400	Manes.01G097400.1	Manes.01G097400.1.p	PHD finger family protein
Manes.01G121000	Manes.01G121000.1	Manes.01G121000.1.p	RING/FYVE/PHD zinc finger superfamily protein
Manes.01G166400	Manes.01G166400.1	Manes.01G166400.1.p	RING/FYVE/PHD zinc finger superfamily protein
Manes.01G185400	Manes.01G185400.1	Manes.01G185400.1.p	RING/FYVE/PHD zinc finger superfamily protein
Manes.01G185400	Manes.01G185400.2	Manes.01G185400.2.p	RING/FYVE/PHD zinc finger superfamily protein
Manes.01G185400	Manes.01G185400.3	Manes.01G185400.3.p	RING/FYVE/PHD zinc finger superfamily protein
Manes.01G206700	Manes.01G206700.1	Manes.01G206700.1.p	Acyl-CoA N-acyltransferase with RING/FYVE/PHD-type zinc finger protein
Manes.01G227100	Manes.01G227100.1	Manes.01G227100.1.p	RING/FYVE/PHD zinc finger superfamily protein
Manes.02G043000	Manes.02G043000.1	Manes.02G043000.1.p	Acyl-CoA N-acyltransferase with RING/FYVE/PHD-type zinc finger protein
Manes.02G073300	Manes.02G073300.1	Manes.02G073300.1.p	RING/FYVE/PHD zinc finger superfamily protein
Manes.02G123900	Manes.02G123900.1	Manes.02G123900.1.p	RING/FYVE/PHD zinc finger superfamily protein
Manes.02G158700	Manes.02G158700.1	Manes.02G158700.1.p	PHD finger family protein
Manes.02G169600	Manes.02G169600.1	Manes.02G169600.1.p	RING/FYVE/PHD-type zinc finger family protein
Manes.03G045000	Manes.03G045000.1	Manes.03G045000.1.p	RING/FYVE/PHD-type zinc finger family protein
Manes.03G078000	Manes.03G078000.1	Manes.03G078000.1.p	RING/FYVE/PHD zinc finger superfamily protein
Manes.03G154900	Manes.03G154900.1	Manes.03G154900.1.p	RING/FYVE/PHD zinc finger superfamily protein
Manes.03G178900	Manes.03G178900.1	Manes.03G178900.1.p	Acyl-CoA N-acyltransferase with RING/FYVE/PHD-type zinc finger protein
Manes.04G010300	Manes.04G010300.1	Manes.04G010300.1.p	PHD finger family protein
Manes.04G024600	Manes.04G024600.1	Manes.04G024600.1.p	DNA-binding protein with MIZ/SP-RING zinc finger, PHD-finger and SAP domain
Manes.04G024600	Manes.04G024600.2	Manes.04G024600.2.p	DNA-binding protein with MIZ/SP-RING zinc finger, PHD-finger and SAP domain
Manes.04G035900	Manes.04G035900.1	Manes.04G035900.1.p	RING/FYVE/PHD zinc finger superfamily protein
Manes.04G035900	Manes.04G035900.2	Manes.04G035900.2.p	RING/FYVE/PHD zinc finger superfamily protein
Manes.04G086100	Manes.04G086100.1	Manes.04G086100.1.p	PHD finger family protein / bromo-adjacent homology (BAH) domain-containing protein
Manes.04G086100	Manes.04G086100.2	Manes.04G086100.2.p	PHD finger family protein / bromo-adjacent homology (BAH) domain-containing protein
Manes.04G086100	Manes.04G086100.3	Manes.04G086100.3.p	PHD finger family protein / bromo-adjacent homology (BAH) domain-containing protein
Manes.05G002900	Manes.05G002900.1	Manes.05G002900.1.p	RING/FYVE/PHD zinc finger superfamily protein
Manes.05G077800	Manes.05G077800.1	Manes.05G077800.1.p	Acyl-CoA N-acyltransferase with RING/FYVE/PHD-type zinc finger protein
Manes.05G077800	Manes.05G077800.2	Manes.05G077800.2.p	Acyl-CoA N-acyltransferase with RING/FYVE/PHD-type zinc finger protein
Manes.05G077800	Manes.05G077800.3	Manes.05G077800.3.p	Acyl-CoA N-acyltransferase with RING/FYVE/PHD-type zinc finger protein
Manes.05G077800	Manes.05G077800.4	Manes.05G077800.4.p	Acyl-CoA N-acyltransferase with RING/FYVE/PHD-type zinc finger protein
Manes.05G101500	Manes.05G101500.1	Manes.05G101500.1.p	RING/FYVE/PHD zinc finger superfamily protein
Manes.05G144900	Manes.05G144900.1	Manes.05G144900.1.p	RING/FYVE/PHD zinc finger superfamily protein
Manes.06G019800	Manes.06G019800.1	Manes.06G019800.1.p	RING/FYVE/PHD zinc finger superfamily protein
Manes.06G050600	Manes.06G050600.1	Manes.06G050600.1.p	RING/FYVE/PHD zinc finger superfamily protein
Manes.06G050600	Manes.06G050600.2	Manes.06G050600.2.p	RING/FYVE/PHD zinc finger superfamily protein
Manes.06G062000	Manes.06G062000.1	Manes.06G062000.1.p	RING/FYVE/PHD zinc finger superfamily protein
Manes.06G085200	Manes.06G085200.1	Manes.06G085200.1.p	RING/FYVE/PHD zinc finger superfamily protein
Manes.06G085200	Manes.06G085200.10	Manes.06G085200.10.p	RING/FYVE/PHD zinc finger superfamily protein
Manes.06G085200	Manes.06G085200.12	Manes.06G085200.12.p	RING/FYVE/PHD zinc finger superfamily protein
Manes.06G085200	Manes.06G085200.2	Manes.06G085200.2.p	RING/FYVE/PHD zinc finger superfamily protein
Manes.06G085200	Manes.06G085200.5	Manes.06G085200.5.p	RING/FYVE/PHD zinc finger superfamily protein
Manes.06G085200	Manes.06G085200.6	Manes.06G085200.6.p	RING/FYVE/PHD zinc finger superfamily protein
Manes.06G092200	Manes.06G092200.1	Manes.06G092200.1.p	RING/FYVE/PHD zinc finger superfamily protein
Manes.06G177100	Manes.06G177100.1	Manes.06G177100.1.p	RING/FYVE/PHD zinc finger superfamily protein
Manes.07G007000	Manes.07G007000.1	Manes.07G007000.1.p	PHD finger family protein
Manes.07G066300	Manes.07G066300.1	Manes.07G066300.1.p	Homeodomain-like protein with RING/FYVE/PHD-type zinc finger domain
Manes.07G123600	Manes.07G123600.1	Manes.07G123600.1.p	RING/FYVE/PHD zinc finger superfamily protein
Manes.08G016600	Manes.08G016600.1	Manes.08G016600.1.p	Acyl-CoA N-acyltransferase with RING/FYVE/PHD-type zinc finger domain
Manes.08G016600	Manes.08G016600.2	Manes.08G016600.2.p	Acyl-CoA N-acyltransferase with RING/FYVE/PHD-type zinc finger domain
Manes.08G016600	Manes.08G016600.3	Manes.08G016600.3.p	Acyl-CoA N-acyltransferase with RING/FYVE/PHD-type zinc finger domain
Manes.08G016600	Manes.08G016600.4	Manes.08G016600.4.p	Acyl-CoA N-acyltransferase with RING/FYVE/PHD-type zinc finger domain
Manes.08G083100	Manes.08G083100.1	Manes.08G083100.1.p	RING/FYVE/PHD zinc finger superfamily protein
Manes.08G150000	Manes.08G150000.1	Manes.08G150000.1.p	PHD finger protein-related
Manes.08G150000	Manes.08G150000.2	Manes.08G150000.2.p	PHD finger protein-related
Manes.08G161100	Manes.08G161100.1	Manes.08G161100.1.p	RING/FYVE/PHD zinc finger superfamily protein
Manes.08G161100	Manes.08G161100.2	Manes.08G161100.2.p	RING/FYVE/PHD zinc finger superfamily protein
Manes.09G026400	Manes.09G026400.1	Manes.09G026400.1.p	RING/FYVE/PHD zinc finger superfamily protein
Manes.09G048300	Manes.09G048300.1	Manes.09G048300.1.p	Acyl-CoA N-acyltransferase with RING/FYVE/PHD-type zinc finger domain
Manes.09G048300	Manes.09G048300.2	Manes.09G048300.2.p	Acyl-CoA N-acyltransferase with RING/FYVE/PHD-type zinc finger domain
Manes.09G063400	Manes.09G063400.1	Manes.09G063400.1.p	Acyl-CoA N-acyltransferase with RING/FYVE/PHD-type zinc finger domain
Manes.09G088900	Manes.09G088900.1	Manes.09G088900.1.p	Acyl-CoA N-acyltransferase with RING/FYVE/PHD-type zinc finger domain
Manes.09G088900	Manes.09G088900.2	Manes.09G088900.2.p	Acyl-CoA N-acyltransferase with RING/FYVE/PHD-type zinc finger domain
Manes.09G099800	Manes.09G099800.1	Manes.09G099800.1.p	RING/FYVE/PHD zinc finger superfamily protein
Manes.09G129500	Manes.09G129500.1	Manes.09G129500.1.p	RING/FYVE/PHD zinc finger superfamily protein
Manes.09G129500	Manes.09G129500.2	Manes.09G129500.2.p	RING/FYVE/PHD zinc finger superfamily protein
Manes.09G129500	Manes.09G129500.3	Manes.09G129500.3.p	RING/FYVE/PHD zinc finger superfamily protein
Manes.09G129500	Manes.09G129500.4	Manes.09G129500.4.p	RING/FYVE/PHD zinc finger superfamily protein
Manes.09G129500	Manes.09G129500.5	Manes.09G129500.5.p	RING/FYVE/PHD zinc finger superfamily protein
Manes.09G129500	Manes.09G129500.6	Manes.09G129500.6.p	RING/FYVE/PHD zinc finger superfamily protein
Manes.10G019800	Manes.10G019800.1	Manes.10G019800.1.p	RING/FYVE/PHD zinc finger superfamily protein
Manes.10G075000	Manes.10G075000.1	Manes.10G075000.1.p	Homeodomain-like protein with RING/FYVE/PHD-type zinc finger domain
Manes.10G140700	Manes.10G140700.1	Manes.10G140700.1.p	PHD finger family protein
Manes.11G142100	Manes.11G142100.1	Manes.11G142100.1.p	DNA-binding protein with MIZ/SP-RING zinc finger, PHD-finger and SAP domain
Manes.11G142100	Manes.11G142100.2	Manes.11G142100.2.p	DNA-binding protein with MIZ/SP-RING zinc finger, PHD-finger and SAP domain
Manes.11G153000	Manes.11G153000.1	Manes.11G153000.1.p	Acyl-CoA N-acyltransferase with RING/FYVE/PHD-type zinc finger domain
Manes.11G153000	Manes.11G153000.2	Manes.11G153000.2.p	Acyl-CoA N-acyltransferase with RING/FYVE/PHD-type zinc finger domain
Manes.12G070900	Manes.12G070900.1	Manes.12G070900.1.p	PHD finger family protein / bromo-adjacent homology (BAH) domain-containing protein
Manes.12G070900	Manes.12G070900.2	Manes.12G070900.2.p	PHD finger family protein / bromo-adjacent homology (BAH) domain-containing protein
Manes.12G071000	MePHD1	MePHD1	PHD finger family protein / bromo-adjacent homology (BAH) domain-containing protein
Manes.12G071100	Manes.12G071100.1	Manes.12G071100.1.p	PHD finger family protein / bromo-adjacent homology (BAH) domain-containing protein
Manes.12G071100	Manes.12G071100.2	Manes.12G071100.2.p	PHD finger family protein / bromo-adjacent homology (BAH) domain-containing protein
Manes.12G080700	Manes.12G080700.1	Manes.12G080700.1.p	RING/FYVE/PHD zinc finger superfamily protein
Manes.12G090700	Manes.12G090700.1	Manes.12G090700.1.p	PHD finger transcription factor, putative
Manes.12G090800	Manes.12G090800.1	Manes.12G090800.1.p	PHD finger transcription factor, putative
Manes.12G139800	Manes.12G139800.1	Manes.12G139800.1.p	RING/FYVE/PHD zinc finger superfamily protein
Manes.12G152400	Manes.12G152400.1	Manes.12G152400.1.p	RING/FYVE/PHD zinc finger superfamily protein
Manes.12G152400	Manes.12G152400.2	Manes.12G152400.2.p	RING/FYVE/PHD zinc finger superfamily protein
Manes.13G084500	Manes.13G084500.1	Manes.13G084500.1.p	PHD finger transcription factor, putative
Manes.13G088500	Manes.13G088500.1	Manes.13G088500.1.p	RING/FYVE/PHD zinc finger superfamily protein
Manes.13G153700	Manes.13G153700.1	Manes.13G153700.1.p	RING/FYVE/PHD zinc finger superfamily protein
Manes.14G007200	Manes.14G007200.1	Manes.14G007200.1.p	RING/FYVE/PHD zinc finger superfamily protein
Manes.14G007900	Manes.14G007900.1	Manes.14G007900.1.p	RING/FYVE/PHD zinc finger superfamily protein
Manes.14G007900	Manes.14G007900.2	Manes.14G007900.2.p	RING/FYVE/PHD zinc finger superfamily protein
Manes.14G007900	Manes.14G007900.3	Manes.14G007900.3.p	RING/FYVE/PHD zinc finger superfamily protein
Manes.14G078200	Manes.14G078200.1	Manes.14G078200.1.p	RING/FYVE/PHD zinc finger superfamily protein
Manes.14G128500	Manes.14G128500.1	Manes.14G128500.1.p	RING/FYVE/PHD zinc finger superfamily protein
Manes.14G135700	Manes.14G135700.1	Manes.14G135700.1.p	RING/FYVE/PHD zinc finger superfamily protein
Manes.14G135700	Manes.14G135700.2	Manes.14G135700.2.p	RING/FYVE/PHD zinc finger superfamily protein
Manes.15G029000	Manes.15G029000.1	Manes.15G029000.1.p	Acyl-CoA N-acyltransferase with RING/FYVE/PHD-type zinc finger protein
Manes.15G066000	Manes.15G066000.1	Manes.15G066000.1.p	RING/FYVE/PHD zinc finger superfamily protein
Manes.15G092800	Manes.15G092800.1	Manes.15G092800.1.p	Acyl-CoA N-acyltransferase with RING/FYVE/PHD-type zinc finger protein
Manes.15G190700	Manes.15G190700.1	Manes.15G190700.1.p	RING/FYVE/PHD zinc finger superfamily protein
Manes.16G041700	Manes.16G041700.1	Manes.16G041700.1.p	RING/FYVE/PHD zinc finger superfamily protein
Manes.16G043600	Manes.16G043600.1	Manes.16G043600.1.p	RING/FYVE/PHD-type zinc finger family protein
Manes.16G043600	Manes.16G043600.2	Manes.16G043600.2.p	RING/FYVE/PHD-type zinc finger family protein
Manes.16G043600	Manes.16G043600.3	Manes.16G043600.3.p	RING/FYVE/PHD-type zinc finger family protein
Manes.16G049100	Manes.16G049100.1	Manes.16G049100.1.p	RING/FYVE/PHD zinc finger superfamily protein
Manes.16G049200	Manes.16G049200.1	Manes.16G049200.1.p	RING/FYVE/PHD zinc finger superfamily protein
Manes.16G090100	Manes.16G090100.1	Manes.16G090100.1.p	RING/FYVE/PHD-type zinc finger family protein
Manes.16G090100	Manes.16G090100.2	Manes.16G090100.2.p	RING/FYVE/PHD-type zinc finger family protein
Manes.16G090100	Manes.16G090100.3	Manes.16G090100.3.p	RING/FYVE/PHD-type zinc finger family protein
Manes.17G016200	Manes.17G016200.1	Manes.17G016200.1.p	RING/FYVE/PHD zinc finger superfamily protein
Manes.17G027500	Manes.17G027500.1	Manes.17G027500.1.p	PHD finger family protein / bromo-adjacent homology (BAH) domain-containing protein
Manes.17G058000	Manes.17G058000.1	Manes.17G058000.1.p	RING/FYVE/PHD zinc finger superfamily protein
Manes.17G060900	Manes.17G060900.1	Manes.17G060900.1.p	RING/FYVE/PHD-type zinc finger family protein
Manes.17G089400	Manes.17G089400.1	Manes.17G089400.1.p	RING/FYVE/PHD zinc finger superfamily protein
Manes.18G011300	Manes.18G011300.1	Manes.18G011300.1.p	RING/FYVE/PHD zinc finger superfamily protein
Manes.18G046500	Manes.18G046500.1	Manes.18G046500.1.p	PHD finger transcription factor, putative
Manes.18G072800	Manes.18G072800.1	Manes.18G072800.1.p	PHD finger family protein
Manes.18G083600	Manes.18G083600.1	Manes.18G083600.1.p	RING/FYVE/PHD-type zinc finger family protein
Manes.18G089400	Manes.18G089400.1	Manes.18G089400.1.p	RING/FYVE/PHD zinc finger superfamily protein
Manes.S022700	Manes.S022700.1	Manes.S022700.1.p	Acyl-CoA N-acyltransferase with RING/FYVE/PHD-type zinc finger domain
