# Supplementary material for: MePHD1 as a PHD-Finger Protein Negatively Regulates ADP-Glucose Pyrophosphorylase Small Subunit1a Gene in Cassava
Source: Int J Mol Sci. 2018 Sep 19;19(9):2831. doi: 10.3390/ijms19092831 (PMC6164933; doi:10.3390/ijms19092831)
Supplement: Supplementary file 1 [file ijms-19-02831-s001.zip › Table S2.pdf]

**Table S2.** *Cis*-element distribution in the promoter of *MePHD1* related to heat and plant hormones.

| <i>Cis</i> -element | Position/Strand                                    | Sequence                   | Expected function                    |
|---------------------|----------------------------------------------------|----------------------------|--------------------------------------|
| HSE                 | -1232(+),-132(+)                                   | AAAAAAATTTT/A<br>AAAAAATTC | Heat stress-responsive<br>element    |
| ABRE                | -409(+)                                            | CACGTG                     | ABA-responsive element               |
| ARE                 | -956(+),-854(+),-691(+),<br>-417(+),-405(+),-11(+) | TGTCNN                     | Auxine-responsive<br>element         |
| ERE/GCC box         | -1982(-),-1946(-),-192<br>5(+),-1853(+),-1834(-)   | GGCCGCCG/<br>GGCAGCCG      | Ethylene-responsive<br>element       |
| SARE                | -1384(+)                                           | TTTTCTTCTC                 | Salicylic acid-responsive<br>element |
| GARE                | -1804(+)/-573(+)                                   | CCTTTT/<br>TTTTTTCC        | Gibberellin-responsive<br>element    |
